# Supplementary material
Source: Springer Nature journal article supplement (https://www.springermedizin.de/resource/supplementary/12891_2008_576_MOESM4_ESM.pdf/9511374)

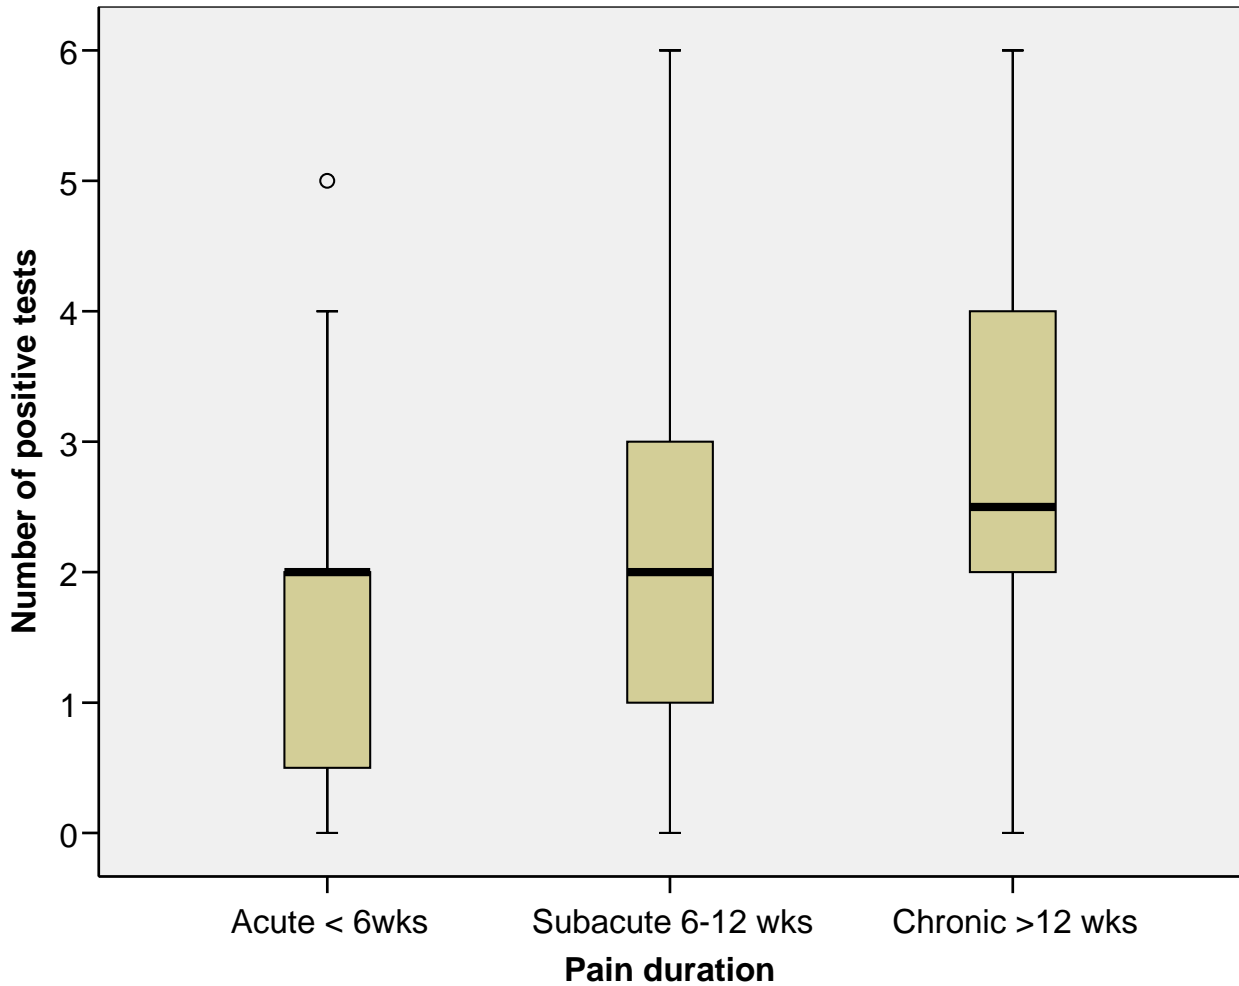

Supplement: MOESM4 [file 9511374]
